# Supplementary material for: The influence of particle size of amino-functionalized MCM-41 silicas on CO2 adsorption
Source: Royal Society of Chemistry journal article supplement (doi:10.1039/c7cp05177h), 2017-01-01
Supplement: c7cp05177h1.pdf [file c7cp05177h1.pdf]

# The influence of particle size of amino-functionalized MCM-41 silicas on CO<sub>2</sub> adsorption

Giorgio Gatti<sup>a</sup>, Chiara Vittoni<sup>a</sup>, Daniele Costenaro<sup>a</sup>, Geo Paul<sup>a</sup>, Enzo Mangano<sup>b</sup>, Stefano Brandani<sup>b</sup>, Leonardo Marchese<sup>a</sup> and Chiara Bisio<sup>a,c,\*</sup>

<sup>a</sup> Dipartimento di Scienze e Innovazione Tecnologica and “Centro interdisciplinare Nano-SiSTeMI”, Università del Piemonte Orientale, via T. Michel 11, 15121 Alessandria, Italy;

<sup>b</sup> Scottish Carbon Capture and Storage, School of Engineering, University of Edinburgh, Mayfield Road, Edinburgh, EH9 3FB, United Kingdom;

<sup>c</sup> ISTM-CRN Istituto di Scienze e Tecnologie Molecolari, via G. Venezian 21, Milano, Italy.

\*Corresponding Author: chiara.bisio@uniupo.it

## Supporting Information

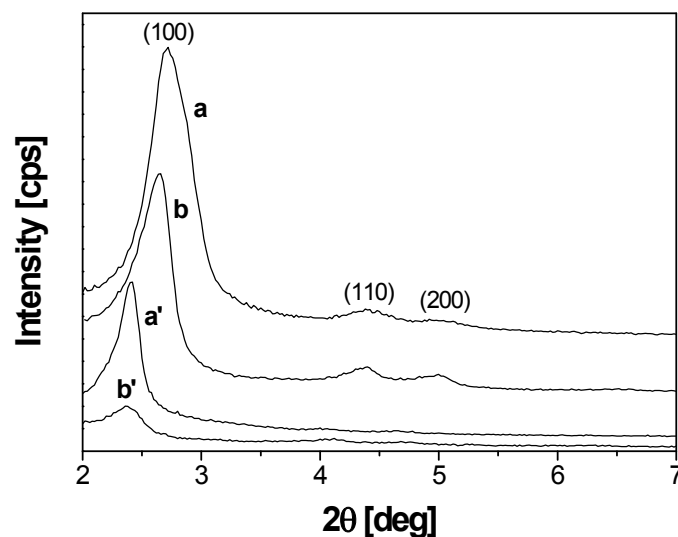

**Figure S.I.1.** XRD patterns between 2 and 7 °2θ of MCM-41 micro (a), MCM-41 nano (b), P\_MCM-41 micro (a') and P\_MCM-41 nano (b').

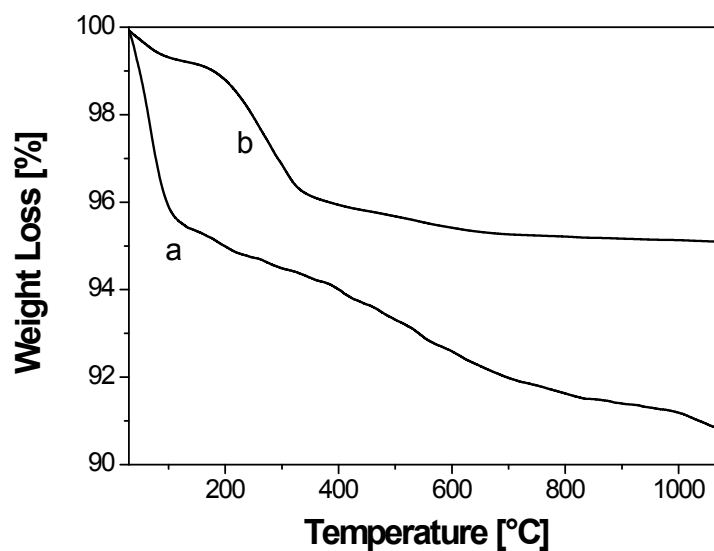

**Figure S.I.2.** TGA curves of MCM-41 micro (a), MCM-41 nano (b). The measurements were done under Argon flow (20 ml/min) from 20 to 1100°C (1°C min<sup>-1</sup> heating rate).

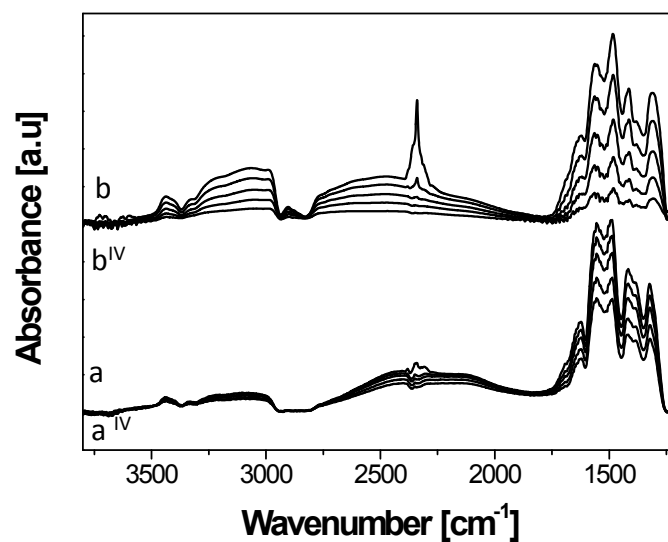

**Figure S.I.3.** FTIR spectra of CO<sub>2</sub> adsorbed (P<sub>max</sub> = 60 mbar) at 35°C on P\_MCM-41 micro (a-a<sup>IV</sup>) and P\_MCM-41 nano (b-b<sup>IV</sup>). The arrows indicate decreasing CO<sub>2</sub> pressure until vacuum. Spectra are reported after subtraction of the spectrum recorded before CO<sub>2</sub> interaction, used as a background.

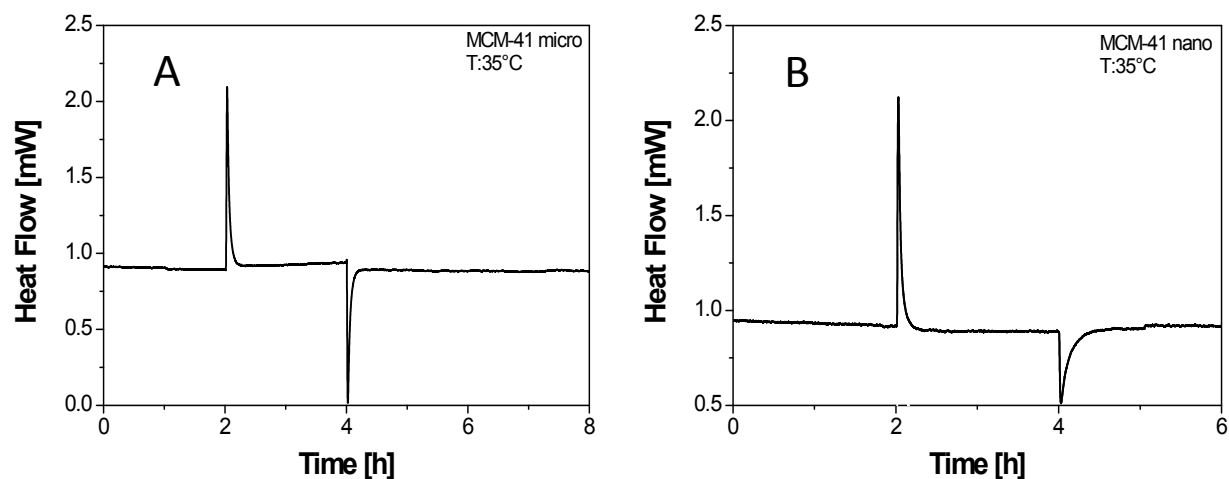

Figure S.I.4. Heat Flow from DSC-TGA Analysis for MCM-41 micro (Frame A) and MCM-41 nano (Frame B) samples.

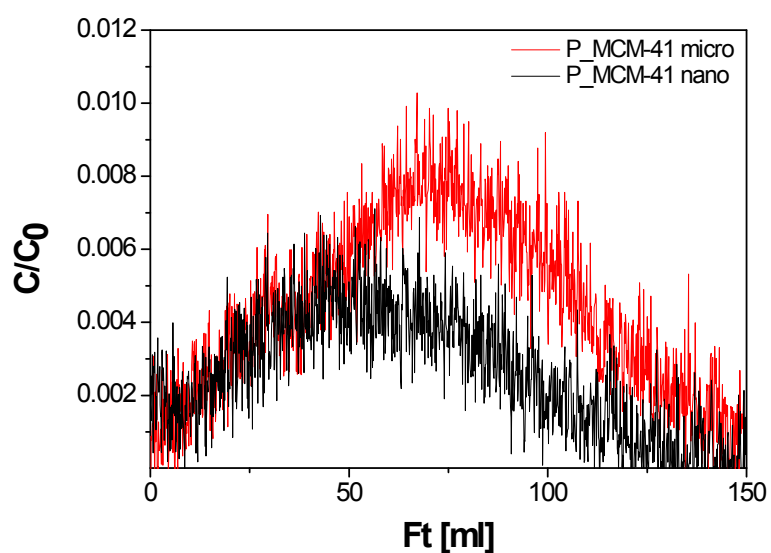

**Figure S.I.5.** TPD curves for P\_MCM-41 micro and P\_MCM-41 nano sample at 2 ml/min flow rates. CO<sub>2</sub> partial pressure: 0.1 bar.

Integrating the area under the TPD curves, the value of irreversible chemisorbed fraction can be achieved. The obtained values of irreversible fractions respectively for P\_MCM-41 micro and P\_MCM-41 nano samples are 0.16 and 0.06 mmol·g<sup>-1</sup>.

| <b>Sample</b>  | <b>TPD<br/>irreversible fraction<br/>[mmol/g]</b> | <b>TGA<br/>irreversible fraction<br/>[mmol/g]</b> | <b>Volumetry<br/>irreversible fraction<br/>[mmol/g]</b> |
|----------------|---------------------------------------------------|---------------------------------------------------|---------------------------------------------------------|
| P_MCM-41 micro | 0.16                                              | 0.16                                              | 0.16                                                    |
| P_MCM-41 nano  | 0.06                                              | 0.07                                              | 0.10                                                    |

Table 1. Irreversible fractions obtained with TPD, TGA and Volumetric Analysis for the grafted MCM-41 materials.

| <b>Sample / Temperature</b> | <b>CO<sub>2</sub> Adsorption<br/>Capacity [mmol/g]</b> | <b>reversible fraction<br/>[%]</b> | <b>irreversible fraction<br/>[%]</b> |
|-----------------------------|--------------------------------------------------------|------------------------------------|--------------------------------------|
| P_MCM-41 micro / 20°C       | 0.63                                                   | 64.9                               | 35.1                                 |
| P_MCM-41 micro / 35°C       | 0.60                                                   | 72.8                               | 27.2                                 |
| P_MCM-41 micro / 50°C       | 0.58                                                   | 78.6                               | 21.4                                 |
| P_MCM-41 micro / 70°C       | 0.55                                                   | 86.6                               | 13.4                                 |
| P_MCM-41 micro / 90°C       | 0.49                                                   | 93.3                               | 6.7                                  |
| P_MCM-41 nano / 20°C        | 0.96                                                   | 87.4                               | 12.6                                 |
| P_MCM-41 nano / 35°C        | 0.79                                                   | 90.7                               | 9.3                                  |
| P_MCM-41 nano / 50°C        | 0.60                                                   | 95.4                               | 4.6                                  |
| P_MCM-41 nano / 70°C        | 0.38                                                   | 96.0                               | 4.0                                  |
| P_MCM-41 nano / 90°C        | 0.21                                                   | 99.1                               | 0.9                                  |

Table 2. CO<sub>2</sub> Adsorption Capacity, reversible and irreversible fractions obtained with TGA analysis for the grafted MCM-41 materials.
